# Supplementary material for: An efficient H2O2-based oxidative bromination of alkenes, alkynes, and aromatics by a divanadium-substituted phosphotungstate
Source: Royal Society of Chemistry journal article supplement (doi:10.1039/c0cc04889e), 2011-01-01
Supplement: c0cc04889e.pdf [file c0cc04889e.pdf]

*Electronic Supplementary Information (ESI) for*

## **An efficient H<sub>2</sub>O<sub>2</sub>-based oxidative bromination of alkenes, alkynes, and aromatics by a divanadium-substituted phosphotungstate**

**Kazuhiro Yonehara, Keigo Kamata, Kazuya Yamaguchi, and Noritaka Mizuno\***

*Department of Applied Chemistry, School of Engineering, The University of Tokyo, 7-3-1 Hongo, Bunkyo-ku, Tokyo 113-8656*

E-mail: tmizuno@mail.ecc.u-tokyo.ac.jp

### **Experimental Section**

**General.** GC analyses were performed on Shimadzu GC-2014 with a FID detector equipped with a TC-WAX capillary column (0.25 mm × 30 m, GL Science Inc.). Mass spectra were recorded on a Shimadzu GCMS-QP2010 equipped with a TC-5HT capillary column (0.25 mm × 30 m, GL Science Inc.) at an ionization voltage of 70 eV. NMR spectra were recorded at room temperature on JEOL JNM-EX-270 (<sup>1</sup>H, 270 MHz; <sup>13</sup>C, 67.8 MHz; <sup>51</sup>V, 70.9 MHz; and <sup>31</sup>P, 109 MHz). Chemical shifts ( $\delta$ ) were reported in ppm downfield from TMS (internal, in CDCl<sub>3</sub>), TMS (internal, in CDCl<sub>3</sub>), neat VOCl<sub>3</sub> (external), and 85% H<sub>3</sub>PO<sub>4</sub> (external) for <sup>1</sup>H, <sup>13</sup>C, <sup>51</sup>V, and <sup>31</sup>P NMR spectra, respectively. Vanadium salts and complexes were obtained from Wako, Aldrich, or Kanto (reagent grade), and used as received. Solvents and substrates were obtained from Tokyo Kasei or Aldrich (reagent grade), and purified prior to the use.<sup>S1</sup>

**Synthesis and Characterization of TBA<sub>4</sub>[ $\gamma$ -HPV<sub>2</sub>W<sub>10</sub>O<sub>40</sub>] (1).** The cesium salt of deprotonated divanadium-substituted phosphotungstate Cs<sub>5</sub>[ $\gamma$ -PV<sub>2</sub>W<sub>10</sub>O<sub>40</sub>] was synthesized according to the published literature procedures<sup>S2</sup> and characterized by IR spectroscopy. The tetra-*n*-butylammonium (TBA) salt of the monoprotinated derivative TBA<sub>4</sub>[ $\gamma$ -HPV<sub>2</sub>W<sub>10</sub>O<sub>40</sub>] (**1**) was prepared by the cation exchange reaction.<sup>10</sup> Sodium metavanadate (1.2 mmol) was dissolved in 120 mL of hot water. Upon cooling, the pH of the solution was adjusted to 2.0 with 3 M HCl. Cs<sub>5</sub>[ $\gamma$ -PV<sub>2</sub>W<sub>10</sub>O<sub>40</sub>]·6H<sub>2</sub>O (3.8 g, 1.1 mmol) was dissolved into the solution and the insoluble materials were removed by filtration. TBABr (1.8 g, 5.6 mmol) was added with vigorous stirring. The precipitate was collected by filtration, washed with 400 mL of water, and dried in vacuo. Recrystallization from acetone/diethyl ether gave analytically pure orange crystals of **1**. Yield: 60%. <sup>51</sup>V NMR (CD<sub>3</sub>CN):  $\delta$  -581 ppm. <sup>1</sup>H NMR (CD<sub>3</sub>CN):  $\delta$  4.38 ppm (1H per anion). <sup>31</sup>P NMR (CD<sub>3</sub>CN):  $\delta$  -14.1 ppm. Anal. calcd for [(C<sub>4</sub>H<sub>9</sub>)<sub>4</sub>N]<sub>4</sub>[HPV<sub>2</sub>W<sub>10</sub>O<sub>40</sub>]·H<sub>2</sub>O; C, 21.4; H, 4.12; N, 1.56; P, 0.86; V, 2.83; W, 51.1. Found: C, 21.3; H, 3.96; N, 1.61; P, 0.84; V, 2.92; W, 49.0. IR (KBr): 1096, 1062, 1039, 1001, 952, 870, 803, 752, 534, 489, 399, 358, 333, 282, 256 cm<sup>-1</sup>.

### **Additional References**

- S1 *Purification of Laboratory Chemicals*, 3rd ed., ed. by D. D. Perrin, W. L. F. Armarego, Pergamon Press, Oxford, U.K., 1988.
- S2 P. J. Domaille and R. L. Harlow, *J. Am. Chem. Soc.*, 1986, **108**, 2108.

- S3 N. B. Barhate, A. S. Gajare, R. D. Wakharkar and A. V. Bedekar, *Tetrahedron*, 1999, **55**, 11127.  
S4 T. Ying, W. Bao and Y. Zhang, *J. Chem. Res.*, 2004, 806.  
S5 N. Narender, P. Srinivasu, S. J. Kulkarni and K. V. Raghavan, *Synth. Commun.* 2000, **30**, 3669.  
S6 A. Podgoršek, S. Stavber, M. Zupan and J. Iskra, *Tetrahedron*, 2009, **65**, 4429.  
S7 K. V. V. K. Mohan, N. Narender, P. Srinivasu, S. J. Kulkarni and K. V. Raghavan, *Synth. Commun.*, 2004, **34**, 2143.

### Compound Data

Conversions of substrates, yields of products, and selectivities to products are also summarized below.

#### **Compound 3a (Conv. 99%, Yield 90%, Select. 91%)**

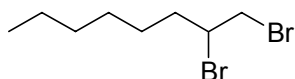

GC (TC-WAX capillary column, 0.25 mm × 30 m, GL Science Inc.): carrier gas (N<sub>2</sub>, 130 kPa), initial column temperature (50°C), initial time (5 min), final column temperature (220°C), progress rate (10°C/min), injection temperature (250°C), detection temperature (250°C), retention time (15.51 min).

MS (EI): *m/z* (%): 151(8), 149 (10), 137 (7), 135 (8), 112 (8), 111 (69), 71 (10), 70 (11), 69 (100), 67 (7), 57 (46), 56 (8), 55 (49), 53 (7).

<sup>1</sup>H NMR (CDCl<sub>3</sub>, TMS): δ 4.22–4.12 (m, 1H), 3.85 (dd, *J* = 10.0, 4.5 Hz, 1H), 3.63 (dd, *J* = 10.0, 10.0 Hz, 1H), 2.20–2.07 (m, 1H), 1.85–1.71 (m, 1H), 1.57–1.27 (m, 8H), 0.90 (t, *J* = 6.6 Hz, 3H).

<sup>13</sup>C {<sup>1</sup>H} NMR (CDCl<sub>3</sub>, TMS): δ 53.1, 36.4, 36.2, 31.5, 28.5, 26.7, 22.5, 14.0.

#### **Compound erythro-3b (2*R*\*3*S*\*) (Conv. 99%, Yield 87%, Select. 88%)**

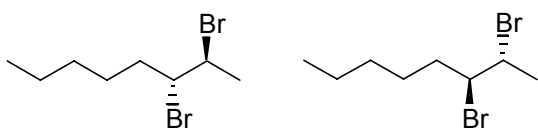

GC (TC-WAX capillary column, 0.25 mm × 30 m, GL Science Inc.): carrier gas (N<sub>2</sub>, 130 kPa), initial column temperature (50°C), initial time (5 min), final column temperature (220°C), progress rate (10°C/min), injection temperature (250°C), detection temperature (250°C), retention time (14.31 min).

MS (EI): *m/z* (%): 191 (5), 112 (8), 111 (60), 70 (10), 69 (100), 67 (6), 57 (10), 56 (8), 55 (59), 53 (7).

<sup>1</sup>H NMR (CDCl<sub>3</sub>, TMS): δ 4.23 (dq, *J* = 7.5, 6.5 Hz, 1H), 4.11 (ddd, *J* = 8.2, 7.5, 3.0 Hz, 1H), 2.16–2.04 (m, 1H), 1.96–1.89 (m, 1H), 1.86 (d, *J* = 6.5 Hz, 3H), 1.69–0.93 (m, 6H), 0.91 (t, *J* = 6.6, 3H).

$^{13}\text{C}\{^1\text{H}\}$  NMR ( $\text{CDCl}_3$ , TMS):  $\delta$  61.8, 52.4, 37.1, 31.0, 26.6, 25.0, 22.4, 14.0.

**Compound *threo*-3b (2*R*\*3*R*\*) (Conv. >99%, Yield 76%, Select. 76%)**

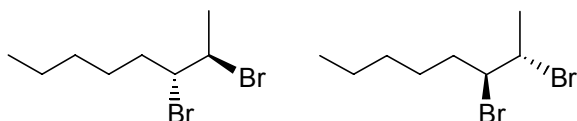

GC (TC-WAX capillary column, 0.25 mm  $\times$  30 m, GL Science Inc.): carrier gas ( $\text{N}_2$ , 130 kPa), initial column temperature ( $50^\circ\text{C}$ ), initial time (5 min), final column temperature ( $220^\circ\text{C}$ ), progress rate ( $10^\circ\text{C}/\text{min}$ ), injection temperature ( $250^\circ\text{C}$ ), detection temperature ( $250^\circ\text{C}$ ), retention time (14.56 min).

MS (EI):  $m/z$  (%): 112 (15), 111 (55), 83 (8), 81 (5), 70 (21), 69 (100), 67 (9), 57 (14), 56 (22), 55 (83), 54 (7), 53 (9).

$^1\text{H}$  NMR ( $\text{CDCl}_3$ , TMS):  $\delta$  4.45 (dq,  $J = 3.0, 6.8$  Hz, 1H), 4.20 (ddd,  $J = 10.3, 3.0, 3.0$  Hz, 1H), 2.13–2.01 (m, 1H), 1.87–1.81 (m, 1H), 1.76 (d,  $J = 6.8$  Hz, 3H), 1.67–1.54 (m, 1H), 1.34 (m, 6H), 0.91 (t,  $J = 6.6$  Hz, 3H).

$^{13}\text{C}\{^1\text{H}\}$  NMR ( $\text{CDCl}_3$ , TMS):  $\delta$  60.1, 52.3, 33.9, 30.9, 27.4, 22.4, 21.5, 13.9.

**Compound 3c (Conv. 93%, Yield 82%, Select. 88%)**

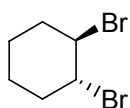

GC (TC-WAX capillary column, 0.25 mm  $\times$  30 m, GL Science Inc.): carrier gas ( $\text{N}_2$ , 130 kPa), initial column temperature ( $50^\circ\text{C}$ ), initial time (5 min), final column temperature ( $220^\circ\text{C}$ ), progress rate ( $10^\circ\text{C}/\text{min}$ ), injection temperature ( $250^\circ\text{C}$ ), detection temperature ( $250^\circ\text{C}$ ), retention time (14.79 min).

MS (EI):  $m/z$  (%): 244 (0.5), 242 (1.1), 240 (0.6), 163 (14), 161 (15), 82 (9), 81 (100), 79 (18), 67 (8), 54 (7), 53 (10).

$^1\text{H}$  NMR ( $\text{CDCl}_3$ , TMS):  $\delta$  4.46 (brs, 2H), 2.52–2.40 (m, 2H), 1.95–1.74 (m, 4H), 1.61–1.26 (m, 2H).

$^{13}\text{C}\{^1\text{H}\}$  NMR ( $\text{CDCl}_3$ , TMS):  $\delta$  55.2, 32.0, 22.4.

**Compound 3d (Conv. 92%, Yield 92%, Select. >99%)**

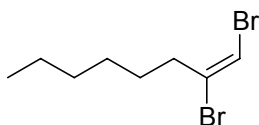

GC (TC-WAX capillary column, 0.25 mm  $\times$  30 m, GL Science Inc.): carrier gas ( $\text{N}_2$ , 130 kPa), initial column temperature ( $50^\circ\text{C}$ ), initial time (5 min), final column temperature ( $220^\circ\text{C}$ ), progress rate ( $10^\circ\text{C}/\text{min}$ ), injection temperature ( $250^\circ\text{C}$ ), detection temperature ( $250^\circ\text{C}$ ), retention time (13.34 min).

MS (EI):  $m/z$  (%): 272 (7), 270 (13), 268 (7), 199 (5), 134 (6), 133 (6), 132 (7), 121 (8), 119 (14), 117 (6), 110 (9), 109 (100), 81 (13), 79 (8), 77 (5), 71 (11), 70 (37), 69 (48), 68 (14), 67 (89), 66 (6), 65 (11), 55 (43), 53 (16), 52 (6), 51 (14).

$^1\text{H}$  NMR ( $\text{CDCl}_3$ , TMS):  $\delta$  6.40 (s, 1H), 2.59 (t,  $J = 7.3$  Hz, 2H), 1.63–1.52 (m, 2H), 1.31 (m, 6H), 0.90 (t,  $J = 6.8$  Hz, 3H).

$^{13}\text{C}\{^1\text{H}\}$  NMR ( $\text{CDCl}_3$ , TMS):  $\delta$  127.0, 102.1, 36.9, 31.5, 28.0, 27.0, 22.5, 14.0.

**Compound 3e (Conv. 99%, Yield 96%, Select. 97%)**

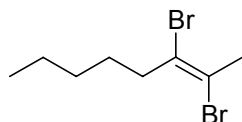

GC (TC-WAX capillary column, 0.25 mm  $\times$  30 m, GL Science Inc.): carrier gas ( $\text{N}_2$ , 130 kPa), initial column temperature ( $50^\circ\text{C}$ ), initial time (5 min), final column temperature ( $220^\circ\text{C}$ ), progress rate ( $10^\circ\text{C}/\text{min}$ ), injection temperature ( $250^\circ\text{C}$ ), detection temperature ( $250^\circ\text{C}$ ), retention time (12.27 min).

MS (EI):  $m/z$  (%): 272 (7), 270 (14), 268 (8), 148 (6), 146 (6), 135 (26), 134 (6), 133 (34), 131 (8), 110 (9), 109 (100), 81 (8), 79 (7), 77 (6), 67 (30), 66 (5), 65 (9), 57 (33), 56 (7), 55 (22), 54 (5), 53 (34), 52 (7), 51 (16).

$^1\text{H}$  NMR ( $\text{CDCl}_3$ , TMS):  $\delta$  2.65 (t,  $J = 7.6$  Hz, 2H), 2.41 (s, 3H), 1.63–1.52 (m, 2H), 1.35–1.28 (m, 4H), 0.91 (t,  $J = 6.9$  Hz, 3H).

$^{13}\text{C}\{^1\text{H}\}$  NMR ( $\text{CDCl}_3$ , TMS):  $\delta$  122.2, 115.1, 40.6, 30.7, 28.8, 27.1, 22.4, 14.0.

**Compound 3f (Conv. 94%, Yield 94%, Select. >99%)**

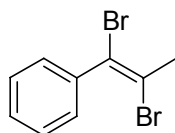

GC (TC-WAX capillary column, 0.25 mm  $\times$  30 m, GL Science Inc.): carrier gas ( $\text{N}_2$ , 130 kPa), initial column temperature ( $100^\circ\text{C}$ ), initial time (5 min), final column temperature ( $250^\circ\text{C}$ ), progress rate ( $10^\circ\text{C}/\text{min}$ ), injection temperature ( $250^\circ\text{C}$ ), detection temperature ( $250^\circ\text{C}$ ), retention time (12.97 min).

MS (EI):  $m/z$  (%): 278 (11), 276 (24), 274 (12), 197 (24), 195 (26), 117 (6), 116 (66), 115 (100), 89 (15), 65 (5), 63 (13), 62 (6), 58 (21), 51 (7), 50 (5).

$^1\text{H}$  NMR ( $\text{CDCl}_3$ , TMS):  $\delta$  7.41–7.26 (m, 5H), 2.61 (s, 3H).

$^{13}\text{C}\{^1\text{H}\}$  NMR ( $\text{CDCl}_3$ , TMS):  $\delta$  140.8, 129.1, 128.6, 128.2, 117.2, 116.8, 29.3.

**Compound 3g (Conv. 96%, Yield 96%, Select. >99%)**

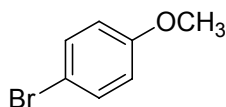

GC (TC-WAX capillary column, 0.25 mm × 30 m; GL Science Inc.): carrier gas (N<sub>2</sub>, 130 kPa), initial column temperature (50°C), initial time (5 min), final column temperature (220°C), progress rate (10°C/min), injection temperature (250°C), detection temperature (250°C), retention time (15.93 min).

MS (EI): m/z (%): 189 (8), 188 (97), 187 (8), 186 (100), 173 (45), 171 (47), 145 (37), 143 (38), 92 (11), 79 (7), 77 (16), 76 (8), 75 (10), 74 (8), 64 (16), 63 (25), 62 (7), 51 (6), 50 (15).

<sup>1</sup>H NMR (CDCl<sub>3</sub>, TMS): δ 7.35 (d, *J* = 9.2 Hz, 2H), 6.75 (d, *J* = 9.2, 2H), 3.76 (s, 3H).

<sup>13</sup>C {<sup>1</sup>H} NMR (CDCl<sub>3</sub>, TMS): δ 158.7, 132.2, 115.7, 112.7, 55.4.

### **Compound 3h (Conv. 98%, Yield 95%, Select. 97%)**

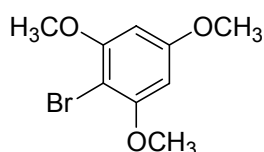

GC (TC-WAX capillary column, 0.25 mm × 30 m, GL Science Inc.): carrier gas (N<sub>2</sub>, 130 kPa), initial column temperature (100°C), initial time (5 min), final column temperature (250°C), progress rate (10°C/min), injection temperature (250°C), detection temperature (250°C), retention time (20.20 min).

MS (EI): m/z (%): 248 (98), 247 (12), 246 (100), 205 (15), 203 (16), 190 (6), 188 (7), 173 (5), 167 (5), 159 (5), 157 (6), 152 (9), 139 (30), 138 (66), 137 (75), 124 (11), 123 (7), 122 (24), 109 (30), 108 (10), 107 (19), 96 (6), 94 (6), 93 (5), 92 (5), 81 (6), 79 (14), 78 (8), 77 (20), 69 (21), 66 (9), 65 (8), 63 (12), 62 (10), 59 (16), 53 (17), 51 (12), 50 (14).

<sup>1</sup>H NMR (CDCl<sub>3</sub>, TMS): δ 6.17 (s, 2H), 3.87 (s, 6H), 3.81 (s, 3H).

<sup>13</sup>C {<sup>1</sup>H} NMR (CDCl<sub>3</sub>, TMS): δ 160.4, 157.4, 91.6, 56.3, 55.4.

### **Compound 4h (Conv. 96%, Yield 88%, Select. 92%)**

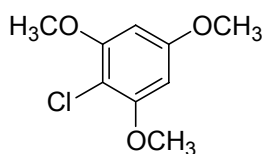

GC (TC-WAX capillary column, 0.25 mm × 30 m, GL Science Inc.): carrier gas (N<sub>2</sub>, 130 kPa), initial column temperature (100°C), initial time (5 min), final column temperature (250°C), progress rate (10°C/min), injection temperature (250°C), detection temperature (250°C), retention time (18.92 min).

MS (EI): m/z (%): 204 (33), 203 (12), 202 (100), 175 (8), 173 (28), 172 (5), 161 (9), 159 (29), 144 (11), 143 (6), 139 (16), 138 (27), 137 (14), 129 (10), 122 (5), 113 (9), 109 (20), 108 (5), 107 (5), 101 (5), 86 (7), 85 (6), 79 (6), 77 (8), 73 (5), 69 (13), 65 (7), 63 (7), 62 (6), 59 (10), 53 (8), 51 (6), 50 (6).

<sup>1</sup>H NMR (CDCl<sub>3</sub>, TMS): δ 6.19 (s, 2H), 3.88 (s, 6H), 3.81 (s, 3H).

<sup>13</sup>C {<sup>1</sup>H} NMR (CDCl<sub>3</sub>, TMS): δ 159.4, 156.6, 91.6, 56.3, 55.5.

**Table S1.** Oxidative bromination of terminal alkenes with H<sub>2</sub>O<sub>2</sub> (comparison)

| Alkene        | Catalyst /Acid                                        | Bromo source          | Solvent                                             | Temp. /°C | Time /min | Total yield /% | Selectivity %<br>dibromoalkane | bromohydrin | TON  | TOF /h <sup>-1</sup> | Ref.      |
|---------------|-------------------------------------------------------|-----------------------|-----------------------------------------------------|-----------|-----------|----------------|--------------------------------|-------------|------|----------------------|-----------|
| <b>2a</b>     | <b>1</b><br>/AcOH                                     | NaBr                  | 1,2-DCE/AcOH<br>(v/v = 1/2)                         | 20        | 10        | 90             | >99                            | –           | 1800 | 10800                | this work |
| <b>2a</b>     | PhEt <sub>3</sub> NCl<br>/HBr                         | HBr/CaBr <sub>2</sub> | CCl <sub>4</sub> /H <sub>2</sub> O                  | r.t.      | 20        | 92             | >99                            | –           | 105  | 315                  | 6b        |
| 1-heptene     | WO <sub>4</sub> <sup>2-</sup> -LDH<br>/–              | NH <sub>4</sub> Br    | CH <sub>3</sub> OH/H <sub>2</sub> O<br>(v/v = 19/1) | 25        | 667       | 60†            | 46                             | –           | 120  | 11                   | 6c        |
| 1-heptene     | WO <sub>4</sub> <sup>2-</sup> -LDH<br>/–              | NH <sub>4</sub> Br    | CH <sub>3</sub> CN/H <sub>2</sub> O<br>(v/v = 1/4)  | 25        | 1180      | 81             | 17                             | 83          | 182  | 9.3                  | 6c        |
| <b>2a</b>     | NH <sub>4</sub> VO <sub>3</sub><br>/HClO <sub>4</sub> | KBr                   | H <sub>2</sub> O/CHCl <sub>3</sub><br>(v/v = 1/1)   | 25        | –         | 95             | >99                            | –           | 0.95 | –                    | 6a        |
| 1-decene      | –<br>/HBr                                             | HBr                   | CCl <sub>4</sub>                                    | r.t.      | 120       | 95             | >99                            | –           | –    | –                    | S3        |
| 1-tetradecene | –<br>/H <sub>2</sub> SO <sub>4</sub>                  | NaBr                  | [bmim]CCl <sub>3</sub> COO                          | r.t.      | 480       | 90             | >99                            | –           | –    | –                    | S4        |

Yields were based on **2a**. LDH = Ni, Al- layered double hydroxide. [bmim] = 1-butyl-3-methylimidazolium. r.t. = room temperature.  
† 1-Bromo-2-methoxyheptane and 2-bromo-1-methoxyheptane were formed in 9% and 23% yields, respectively.

**Table S2.** Oxidative bromination of **2g** with H<sub>2</sub>O<sub>2</sub> (comparison)

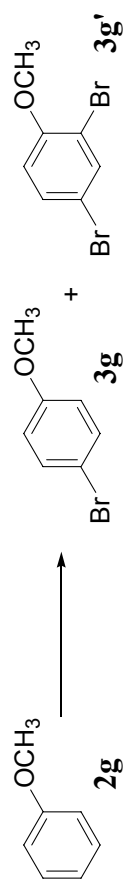

| Catalyst/Acid                                                            | Bromo source       | Solvent                                           | Temp. /°C | Time /min | Total yield /% | Selectivity /%<br>3g | 3g' | TON  | TOF /h <sup>-1</sup> | Ref.      |
|--------------------------------------------------------------------------|--------------------|---------------------------------------------------|-----------|-----------|----------------|----------------------|-----|------|----------------------|-----------|
| <b>1</b><br>/AcOH                                                        | KBr                | 1,2-DCE/AcOH<br>(v/v = 1/2)                       | 20        | 30        | 96             | >99                  | –   | 1920 | 3840                 | this work |
| (NH <sub>4</sub> ) <sub>6</sub> Mo <sub>7</sub> O <sub>24</sub><br>/AcOH | KBr                | AcOH                                              | r.t.      | 20        | 99             | >99                  | –   | 74   | 222                  | 6f        |
| NH <sub>4</sub> VO <sub>3</sub><br>/HBr                                  | HBr/KBr            | H <sub>2</sub> O                                  | r.t.      | 1440      | 96             | 50                   | 50  | 9.6  | 0.4                  | 6d        |
| NH <sub>4</sub> VO <sub>3</sub><br>/HBr                                  | HBr/KBr            | H <sub>2</sub> O/CHCl <sub>3</sub><br>(v/v = 1/1) | r.t.      | 1440      | 94             | >99                  | –   | 9.4  | 0.4                  | 6d        |
| V <sub>2</sub> O <sub>5</sub><br>/HBr                                    | HBr/KBr            | H <sub>2</sub> O                                  | 25        | 100       | 68             | >99                  | –   | 68   | 41                   | 6e        |
| V <sub>2</sub> O <sub>5</sub><br>/HBr                                    | KBr                | H <sub>2</sub> O                                  | 25        | 90        | 85             | 93                   | 7   | 57   | 38                   | 6e        |
| V <sub>2</sub> O <sub>5</sub><br>/HBr                                    | KBr                | H <sub>2</sub> O                                  | 25        | 140       | 30             | >99                  | –   | 12   | 5.1                  | 6e        |
| –<br>/HBr                                                                | HBr/KBr            | H <sub>2</sub> O                                  | 25        | 100       | 15             | >99                  | –   | –    | –                    | 6e        |
| HZSM-5<br>/AcOH                                                          | KBr                | AcOH                                              | r.t.      | 120       | 99             | 98                   | –   | –    | –                    | S5        |
| –<br>/HBr                                                                | HBr                | H <sub>2</sub> O                                  | r.t.      | 480       | 100            | >99                  | –   | –    | –                    | S6        |
| –<br>/AcOH                                                               | NH <sub>4</sub> Br | AcOH                                              | r.t.      | 180       | 99             | 99                   | –   | –    | –                    | S7        |

Yields were based on **2g**. r.t. = room temperature.
